# Supplementary material
Source: Springer Nature journal article supplement (https://www.springermedizin.de/resource/supplementary/13058_2010_9477_MOESM8_ESM.pdf/9702238)

**A**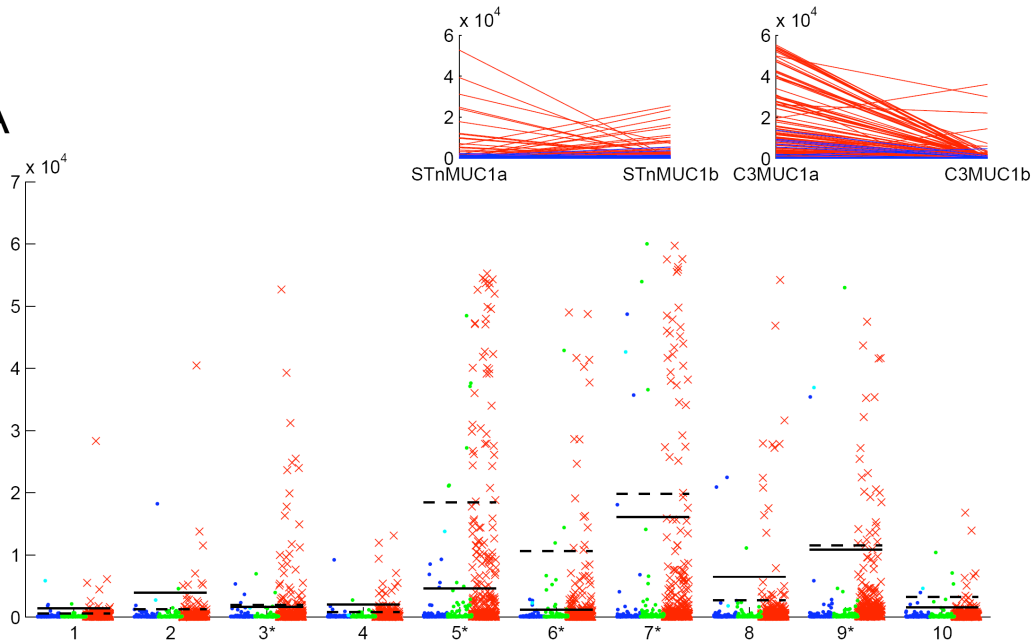**B**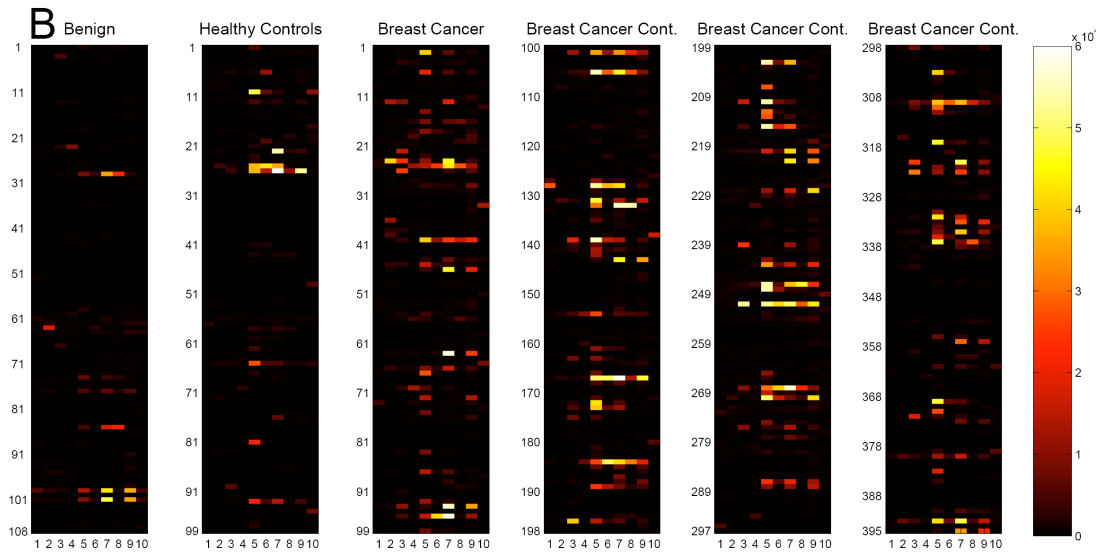

Supplement: MOESM8 [file 9702238]
